# Supplementary material for: Organic farming - Deep genotyping reveals specific selection footprints in barley populations
Source: Research Square preprint supplement (doi:10.21203/rs.3.rs-266048/v1), 2021-03-08
Supplement: Supplementary file 3 [file 4e078c45d7375f0b948cddeb.xlsx]

## Sheet: Table S4
QTL	Variation	Function	Candidate_Gene	wtAFcon F23	wtAForg F23	wtAF F3	SNPcount	Read Coverage	PrelStopCodon
1H95-98	122 AS variant; 14 bp deletion Golf	undescribed protein	HORVU1Hr1G078120	0	0.189066	0.120643	21	363	Golf
2H677	299 AS variant; 12 bp deletion Golf	Peroxisome biogenesis protein 19-2	HORVU2Hr1G097360	0.383838	0.215501	0.263914	32	512	no
2H6-9	3 AS variant	Starch synthase 2, chloroplastic/amyloplastic	HORVU2Hr1G090980	0.409929	0.235658	0.385892	172.5	2863.5	no
2H6-9	346 AS variant; 3 bp deletion Golf	auxin response factor 1	HORVU2Hr1G076920	0	0	0.465116	5	60	no
2H73-84	25 AS variant; 13 bp deletion ISR42-8	GRAS transcription factor	HORVU2Hr1G094020	0.430556	0.274884	0.0572218	149	2260.5	no
3H44-46	6 AS variant; 1 bp deletion ISR42-8	Diacylglycerol kinase	HORVU3Hr1G019210	0.0216832	0.199296	0.0920791	514	8090	no
3H62-64	48 AS variant; 30 bp deletion Golf	early nodulin-like protein 1	HORVU3Hr1G071370	0.019214	0.219677	0.0232384	83	1314.5	no
3H62-64	7 AS variant	Protein NRT1/ PTR FAMILY 4.3	HORVU3Hr1G071510	0.0328185	0.306968	0.075	36	524.5	no
5H143-147	163 AS variant; 3 bp deletion ISR42-8	Ethylene-responsive transcription factor 10	HORVU5Hr1G111550	0.0569211	0.303249	0.0899408	43	802	no
5H43-50	21 AS variant; 1 bp deletion ISR42-8	Plant/F1M20-13 protein	HORVU5Hr1G048410	0.359885	0.326325	0.00316205	68	1115.5	no
5H43-50	150 AS variant; 6 bp deletion ISR42-8; 12 bp deletion Golf	Auxin-responsive protein IAA30	HORVU5Hr1G014300	0.0370959	0.208791	0.00185874	120	2081	no
5H43-50	17 AS variant; 1 bp deletion Golf	Phosphatidylinositol-glycan biosynthesis class X protein	HORVU5Hr1G016340	0.0543933	0.30303	0	15	235	no
6H520_540	87 AS variant; 3 bp deletion ISR42-8	EPIDERMAL PATTERNING FACTOR-like protein 1	HORVU6Hr1G077840	0.180879	0.279461	0.0904374	58	1174.5	no
7H1-3	8 AS variant	MLO-like protein 1	HORVU7Hr1G002390	0.0319767	0.260442	0.0052356	21	375.5	no
7H84bp	2 AS variant	unknown function	HORVU7Hr1G036880	0.0518519	0.221557	0.0541872	36	604	no
AL7.1	4 AS variant	zinc finger protein 3	HORVU7Hr1G118490	0.00765864	0.536296	0	56	1593.5	no
Bmag 0357	638 AS variant; 6 bp deletion Golf	DCD (Development and Cell Death) domain protein	HORVU5Hr1G091160	0.151899	0.312413	0.238671	167	2579.5	no
Bmag 0357	194 AS variant; 12 bp deletion ISR42-8	Mitochondrial glycoprotein family protein	HORVU5Hr1G088460	0.122368	0.362434	0.0651466	42	758	no
Brt1	316 AS variant; 1 bp deletion Golf	Leucine-rich repeat receptor-like protein kinase family protein	HORVU3Hr1G018300	0.00208659	0	0.0556507	150.5	2067	Golf
Brt2	366 AS variant; 24 bp deletion Golf	cellulose synthase like G3	HORVU3Hr1G016990	0.00708861	0.00795624	0.0647513	118	1993	no
D35	19 AS variant; 6 bp deletion ISR42-8	Ribosomal protein-like	HORVU7Hr1G088120	0.0688827	0.200285	0.0346616	678	11386.5	no
Denso /sdw1	2 AS variant	gibberellin 20-oxidase 3	HORVU3Hr1G090980	0.46241	0.416056	0.0738954	187	3300	no
Denso /sdw1	8 AS variant; 1 bp deletion Golf	Bidirectional sugar transporter N3	HORVU3Hr1G091230	0.587324	0.63081	0.0292326	43	731.5	no
Dwarf61	418 AS variant; 36 bp deletion Golf	calmodulin-binding family protein	HORVU3Hr1G049640	0.0151707	0.170036	0.0613288	99	1632	no
Ebmac 0701	292 AS variant; 5 bp deletion ISR42-8; 3 bp deletion Golf	Ras-related protein Rab-6A	HORVU4Hr1G078690	0.0549133	0.227828	0.0480427	62	1133.5	no
Flow Loc T3	873 AS variant; 6 bp deletion ISR42-8	ABC transporter family protein	HORVU3Hr1G027580	0	0	0.0304878	30	543	no
Hv13GEIII/ Bmac 0357	71 AS variant; 3 bp deletion ISR42-8	Y-family DNA polymerase H	HORVU3Hr1G072920	0.0222291	0.227621	0.000585823	233	3513	no
HvBC12/GGD1	21 AS variant; 13 bp deletion ISR42-8	2-oxoglutarate (2OG) and Fe(II)-dependent oxygenase superfamily protein	HORVU5Hr1G048180	0.360947	0.410667	0.00250627	21	356.5	no
HvBRD2	3 AS variant	Flavin-containing monooxygenase family protein	HORVU7Hr1G121260	0.010352	0.223496	0	36	590.5	no
HvCMF10	109 AS variant; 1 bp deletion Golf	unknown function	HORVU1Hr1G053610	0.25374	0.0894309	0.165693	123	1853	Golf
HvD4	2 AS variant	NAC domain protein,	HORVU4Hr1G067270	0.0054902	0.282949	0.132972	84	1309	no
HvGA20Ox3 / Qgh.S42IL.1H	2 AS variant	gibberellin 20 oxidase 2	HORVU3Hr1G089980	0.375421	0.568579	0.104259	80	1195.5	no
HvHeading-3H-HA	119 AS variant; 3 bp deletion ISR42-8	Ethylene insensitive 3 family protein	HORVU3Hr1G089250	0.119186	0.0470397	0.14227	69	1132.5	no
HvHXK9	96 AS variant; 15 bp deletion Golf	unknown function	HORVU3Hr1G065350	0.00414938	0	0.010568	42.5	715	no
HvPRR59	934 AS variant; 6 bp deletion Golf	SelT/selW/selH selenoprotein domain containing protein	HORVU4Hr1G027970	0.00239171	0.00998811	0.0546894	236	3984	no
HvPRR59	904 AS variant; 54 bp deletion ISR42-8; 55 bp deletion Golf	Ethylene-overproduction protein 1	HORVU4Hr1G055900	0.00800686	0.0245491	0.100654	252	3744.5	Golf
NRT2.6	2 AS variant	high affinity nitrate transporter 2.6	HORVU6Hr1G005930	0.0171939	0.195876	0.0824499	103.5	1648.5	no
NRT3.1	6 AS variant	unknown function	HORVU5Hr1G116240	0.0825472	0.432099	0	28	495.5	ISR
PpdH1	69 AS variant; 9 bp deletion ISR42-8	pseudo-response regulator 7	HORVU2Hr1G013400	0.00127146	0.00632911	0.0409117	87	1655.5	no
Qagri.S42IL-6H	13 AS variant; 1 bp deletion ISR42-8; 2 bp deletion Golf	Photosystem II D2 protein	HORVU6Hr1G046850	0.0217391	0.241379	0.0689655	3	52	no
Qagri.S42IL-6H	53 AS variant; 1 bp deletion Golf	Peroxidase superfamily protein	HORVU6Hr1G076260	0.0272171	0.244409	0.19061	201	3535.5	no
Qgh.S42IL.5H	2 AS variant	Pentatricopeptide repeat-containing protein	HORVU5Hr1G095110	0.057047	0.280488	0.205607	19	313	no
Qgh.S42IL.5H	64 AS variant; 11 bp deletion Golf	Pentatricopeptide repeat-containing protein	HORVU5Hr1G100670	0.0447471	0.275986	0.0722433	30	536	Golf
Qgh.S42IL.5H	47 AS variant; 1 bp deletion Golf	Pentatricopeptide repeat-containing protein	HORVU5Hr1G094560	0.015873	0.270413	0.191719	63	1073.5	no
QGL5H / QGW5H	123 AS variant; 6 bp deletion ISR42-8	heat shock protein 21	HORVU5Hr1G061160	0.452414	0.536928	0	49.5	789	no
QGL5H / QGW5H	14 AS variant; 1 bp deletion Golf	BnaC03g66760D protein	HORVU5Hr1G057100	0.449953	0.529096	0	65	1187.5	no
QGL5H / QGW5H	10 AS variant	Protein kinase superfamily protein	HORVU5Hr1G061760	0.44358	0.400095	0.0004662	240	3893.5	no
QGL5H / QGW5H	20 AS variant	Cytoplasmic tRNA 2-thiolation protein 1	HORVU5Hr1G061960	0.386266	0.422939	0.0075188	18	256	no
Qhei.S42IL-2H	116 AS variant; 18 bp deletion ISR42-8	WUSCHEL related homeobox 12	HORVU2Hr1G017270	0.00518135	0.267442	0.164524	74	1084.5	no
Qhei.S42IL-2H	420 AS variant; 6 bp deletion ISR42-8	Rho GTPase-activating protein 3	HORVU2Hr1G094320	0.306849	0.232446	0.0966981	25	389	no
Qhei.S42IL-2H	75 AS variant; 1 bp deletion Golf	ATP synthase subunit b	HORVU2Hr1G096060	0.452538	0.456187	0.043956	199.5	3206	Golf
Qhei.S42IL-4H	3 AS variant	Zinc finger MYM-type protein 1	HORVU4Hr1G070940	0.00438982	0.384953	0.182273	80	1254	no
Qhei.S42IL-7H	6 AS variant	F-box protein	HORVU7Hr1G113340	0.115068	0.563503	0.00138313	42	1113	ISR
Qhei.S42IL-7H	23 AS variant; 3 bp deletion Golf	ENTH/ANTH/VHS superfamily protein	HORVU7Hr1G097510	0.0384193	0.262043	0.0129707	141	2115	no
Qlr.S42-4H.a	72 AS variant; 1 bp deletion Golf	AP2-like ethylene-responsive transcription factor AIL5	HORVU4Hr1G081400	0.00938804	0.10528	0.0887557	199.5	2991	Golf
QLR.S42-7H.a	2 AS variant	flavin-dependent monooxygenase 1	HORVU7Hr1G121290	0.0601504	0.530303	0	7	198.5	no
Qpm.S42-1H.a	44 AS variant	Disease resistance protein	HORVU1Hr1G001490	0.621951	0.623874	0.222222	25.5	427	no
Qpm.S42-1H.a	48 AS variant; 1 bp deletion Golf	TRICHOME BIREFRINGENCE-LIKE 8	HORVU1Hr1G001500	0.636364	0.697479	0.407407	4	120	ISR
Qpm.S42-2H.c	210 AS variant; 3 bp deletion Golf	Chromosome 3B, genomic scaffold, cultivar Chinese Spring	HORVU2Hr1G109840	0.0015015	0.263934	0.154128	99	1581	no
Qrdw.3H	107 AS variant; 9 bp deletion ISR42-8	EamA-like transporter family protein	HORVU3Hr1G095930	0.0333333	0.265823	0.065723	53	869.5	no
Qrdw.3H	6 AS variant	auxin response factor 2	HORVU3Hr1G096510	0.0305344	0.435028	0.0989011	11	154	no
Qrdw.3H	6 AS variant	auxin response factor 2	HORVU3Hr1G096510	0.0305344	0.435028	0.0989011	11	154	no
Qrdw.S42IL.1H	115 AS variant; 9 bp deletion Golf	undescribed protein	HORVU1Hr1G005230	0.399687	0.349196	0.220516	93.5	1384	no
Qrdw.S42IL.1H	122 AS variant; 1 bp deletion Golf	Single-stranded nucleic acid-binding protein R3H	HORVU1Hr1G009430	0.695597	0.601159	0.242711	84	1646	no
Qrdw.S42IL.1H	230 AS variant; 18 bp deletion Golf	Plant Tudor-like RNA-binding protein	HORVU1Hr1G008510	0.640719	0.445916	0.172786	51	870.5	Golf
Qrdw.S42IL.1H	84 AS variant; 3 bp deletion Golf	Potassium transporter family protein	HORVU1Hr1G009100	0.618403	0.518623	0.111461	90	1625	no
Qrdw.S42IL.3H	309 AS variant; 5 bp deletion ISR42-8	Serine/threonine-protein kinase	HORVU3Hr1G015840	0.0257426	0.128268	0.0948276	67	1117	ISR
Qrdw.S42IL.4H	11 AS variant	Triacylglycerol lipase SDP1	HORVU4Hr1G001470	0.1956	0.302231	0.0736968	101	1827	no
Qrdw.S42IL.7H.a	14 AS variant	Disease resistance protein RPM1	HORVU7Hr1G013300	0.0455741	0.473684	0.0073692	164	2832	no
Qrdw.S42IL.7H.a	18 AS variant; 1 bp deletion Golf	exocyst subunit exo70 family protein G1	HORVU7Hr1G022980	0.00869565	0.24911	0.19788	17	255.5	no
Qrdw.S42IL.7H.a	57 AS variant; 3 bp deletion Golf	auxin response factor 16	HORVU7Hr1G021880	0.0130478	0.18643	0.0596071	243.5	4485	no
Qrdw.S42IL.7H.b	3 AS variant	Leucine-rich receptor-like protein kinase family protein	HORVU7Hr1G085790	0.115681	0.284223	0.0206612	53	820	no
Qrdw.S42IL.7H.b	1302 AS variant; 3 bp deletion Golf	ABC transporter G family member 42	HORVU7Hr1G088600	0.0584034	0.222096	0.0456442	480	7521	no
QRI.7H	4 AS variant	B3 domain-containing protein	HORVU7Hr1G004350	0.0327414	0.246949	0.0216129	363	6021.5	no
QRL.S42IL.1H.b	187 AS variant; 2 bp deletion Golf	Cytoplasmic membrane protein	HORVU1Hr1G094070	0.0218341	0.192208	0.048927	63	1035.5	no
QRL.S42IL.4H.a	365 AS variant; 21 bp deletion ISR42-8	GDSL esterase/lipase	HORVU4Hr1G001420	0.147793	0.188525	0.0811124	101	1635.5	no
QRS.3H	145 AS variant; 3 bp deletion Golf	Protein kinase family protein	HORVU3Hr1G055620	0.0211946	0.180373	0.0617402	245	3987	no
QRS.3H	64 AS variant; 2 bp deletion ISR42-8	Serine/threonine-protein kinase	HORVU3Hr1G038690	0.0112988	0.116174	0.0302877	560	9561	ISR
QRV.S42IL.2H	11 AS variant; 4 bp deletion ISR42-8	Ethylene-responsive transcription factor 10	HORVU2Hr1G111680	0.0110393	0.230161	0.140214	244	4005.5	no
Qsdw.2H.b	64 AS variant; 6 bp deletion Golf	unknown protein	HORVU2Hr1G095840	0.46213	0.297521	0.154667	65	1060.5	no
Qtil.1H	10 AS variant	sugar transporter 9	HORVU1Hr1G091460	0.039604	0.161081	0.0880435	50	866.5	no
Qtil.S42IL-3H	6 AS variant	auxin response factor 2	HORVU3Hr1G096510	0.0305344	0.435028	0.0989011	11	154	no
Qtil.S42IL-3H	6 AS variant	auxin response factor 2	HORVU3Hr1G096510	0.0305344	0.435028	0.0989011	11	154	no
Qtil.S42IL-3H	15 AS variant; 5 bp deletion Golf	Cytochrome P450 superfamily protein	HORVU3Hr1G108150	0.144928	0.363636	0	4	78.5	no
Qtil.S42IL-4H	3 AS variant	respiratory burst oxidase homolog B	HORVU4Hr1G086500	0.031856	0.133333	0.137233	93	1607	no
QTL3H_1	109 AS variant; 12 bp deletion ISR42-8	NAC domain protein,	HORVU3Hr1G014140	0.0273865	0.211896	0.117687	87	1446	no
QTL3H_1	294 AS variant; 441 bp deletion ISR42-8	Protein of unknown function (DUF1664)	HORVU3Hr1G015180	0.0518395	0.325898	0.116646	55	702.5	no
QTL3H_4	380 AS variant; 3 bp deletion ISR42-8; 11 bp deletion Golf	Chromosome 3B, genomic scaffold, cultivar Chinese Spring	HORVU3Hr1G111140	0.0681265	0.270108	0.0436364	48	827.5	Golf
Ryd2	29 AS variant; 4 bp deletion ISR42-8	RING/FYVE/PHD zinc finger superfamily protein	HORVU3Hr1G089990	0.50578	0.740576	0.136095	26	398.5	no
Ryd3	295 AS variant; 2 bp deletion Golf	Pathogenesis-related thaumatin superfamily protein	HORVU6Hr1G024780	0.248848	0.156098	0.0982143	13	211	ISR
SCRI-RS239784	44 AS variant; 6 bp deletion Golf	Bifunctional inhibitor/lipid-transfer protein/seed storage 2S albumin superfamily protein	HORVU1Hr1G009800	0.553913	0.480208	0.088224	184	2927.5	no
SD1	no cds alignment	alanine aminotransferase 2	HORVU5Hr1G062990	0	0.01	0	57	956	-
Thresh-1	37 AS variant; 724 bp deletion ISR42-8; 3 bp deletion Golf	WUSCHEL related homeobox 1	HORVU1Hr1G010580	0.504842	0.364474	0.144857	95	1534.5	no
Thresh-1	6 AS variant	laccase 7	HORVU1Hr1G008360	0.585332	0.389112	0.487057	98.5	1602	no
VrnH2	190 AS variant; 12 bp deletion Golf	Auxin efflux carrier family protein	HORVU4Hr1G082680	0.0377636	0.00261324	0.131336	128.5	2167.5	no
