# Supplementary material for: Organic farming - Deep genotyping reveals specific selection footprints in barley populations
Source: Research Square preprint supplement (doi:10.21203/rs.3.rs-266048/v1), 2021-03-08
Supplement: Supplementary file 4 [file e97cac2f06a8299411a2c038.xlsx]

## Sheet: Sheet1
Gene / QTL	Position	Map Source	Category	Reference	Trait	Cross	wtAF conv F23	wtAF org F23	wtAF F3
Qpm.S42-1H.a	1H 0-28cM / 1-120mio bp	98 SSR Markers	Resistance	Von Korf 2005	Powerdy Mildew / Mla	Scarlett x ISR 42-8	0.256367	0.213519	0.148165
Qtil.1H	1H 118-127 cM	9KiSelect	Yield physiology	Reinert 2016	Tiller number	Assosiation Panel	0.0379094	0.0704749	0.129503
QRL.S42IL.1H.b	1H 128-132 cM (199-205 cM BOPA1)	BOPA1	Root & Shoot System	Naz 2014	Root length	Scarlett x ISR 42-8	0.0377263	0.127042	0.0871285
Qrdw.S42IL.1H	1H 15-28 cM (24-40 cM BOPA1)	BOPA1	Root & Shoot System	Naz 2014	Root dry weight	Scarlett x ISR 42-8	0.457845	0.351297	0.172015
SCRI-RS239784	1H 30 cM	9KiSelect	Resistance	Bedawy 2018	Fusarium graminearum resistance	Assosiation Panel	0.63346	0.480119	0.217169
Thresh-1	1H 28 - 37 cM (54 cM BOPA1)	ref Genome	Yield components	Schmalenbach 2011	Thresability	Scarlett x ISR 42-8	0.580616	0.43715	0.171565
HvCMF10	1H 47.5-48 cM	9KiSelect	Yield physiology	Alqudah 2016	Plant Height	Assosiation Panel	0.164487	0.0695545	0.12154
P5CS1	1H 500mio bp	ref Genome	drought tolerance	Muzammil 2018	Proline accumulation	Scarlett x ISR 42-8	0.0345123	0.089849	0.141431
Qgh.S42IL.1H	1H 86-101 cM (134-162 cM BOPA1)	BOPA1	Yield physiology	Naz 2014	Growth Habit & Tiller number	Scarlett x ISR 42-8	0.016169	0.140412	0.135134
HvGA20Ox4	1H 94 cM	9KiSelect	Yield physiology	Marzrc 2018	Tillering + LAI / Gibbereline Oxidase	Assosiation Panel	0.00708535	0.169535	0.156456
-	1H 95.9-97.9 cM	9KiSelect	Yield physiology	Alqudah 2018	LAI at pre anthesis stage	Assosiation Panel	0.00219394	0.0853706	0.120177
Qsdw.2H.b	2H 104-111 cM	9KiSelect	Root System	Reinert 2016	Shoot dry weight	Assosiation Panel	0.0104549	0.152666	0.130577
QRS.2H	2H 105-108 cM	9KiSelect	Root System	Reinert 2016	Root-Shoot Ratio & Root dry weight	Assosiation Panel	0.0103676	0.136296	0.126301
QRV.S42IL.2H	2H 118-121 cM (197-206 cM BOPA1)	BOPA1	Root & Shoot System	Naz 2014	Root Volume	Scarlett x ISR 42-8	0.0128174	0.192867	0.0634136
Qpm.S42-2H.c	2H 139-146 cM / 715-720mio bp	98 SSR Markers	Resistance	Von Korf 2005	Powerdy Mildew & CHS / M1La	Scarlett x ISR 42-8	0.00617727	0.126198	0.0861836
PpdH1	2H 20 cM / 29 mio bp	ref Genome	Yield physiology	Deng 2007	Photoperiod sensitivity – both parents sensitive type	-	0.00242197	0.0391109	0.0492496
Qhei.S42IL-2H	2H 38-58 cM (63-110 cM BOPA1)	BOPA1	drought tolerance	Honsdorf 2014 / Naz 2014	Plant Height / Growth Habit	Scarlett x ISR 42-8	0.0070283	0.0473369	0.242837
	2H 55mio bp	ref Genome	Nutrient uptake	IPK database	Potassium transporter	-	0.0106188	0.16715	0.177089
-	2H 6.5 -9 cM	9KiSelect	Yield physiology	Alqudah 2016	productive Tiller number	Assosiation Panel	0.0823922	0.141178	0.0355546
-	2H 677mio bp (675-680)	ref Genome	Nutrient uptake	Takahashi 2012	secondary metabolism	Rice	0.35148	0.198846	0.171333
-	2H 73.7-83.8 cM	9KiSelect	Yield physiology	Alqudah 2016	productive Tiller number / Vrs 1	Assosiation Panel	0.358195	0.220094	0.222341
Ryd2	3H 100-130 cM	9KiSelect	Resistance	Petcovic 2013	Barley Yellow Dwarf Virus Resistance	MBR1012 x Scarlett	0.237639	0.279984	0.0636586
HvHeading-3H-HA	3H 100.71-109.84 cM	9KiSelect	Yield physiology	Afsharyan 2020	Flowering	MAGIC Population	0.325494	0.331918	0.0807693
HvGA20Ox3	3H 106 cM	9KiSelect	Yield physiology	Marzrc 2018	Tillering / Gibbereline Oxidase 20	Assosiation Panel	0.258334	0.220832	0.0893546
sdw1	3H 108-110	9KiSelect	Yield physiology	Kuczyńska 2012	Semi dwarf 1 / denso	-	0.506158	0.534396	0.0759391
Flow Loc T3	3H 119mio bp	ref Genome	Yield physiology	Mulki 2018	Flowering	Ubi::HvFT3(Golden Promix) x Igri	0.000666829	0.00413536	0.0521691
Qrdw.3H	3H 120-124 cM	9KiSelect	Root System	Reinert 2016	Root dry weight	Assosiation Panel	0.0264445	0.188434	0.0528124
Qtil.S42IL-3H	3H 122-154 cM (204-255 cM BOPA1)	BOPA1	drought tolerance	Honsdorf 2014	Tiller number & Tiller & Biomass	Scarlett x ISR 42-8	0.0399917	0.119229	0.0414391
-	3H 137-139 cM	9KiSelect	Yield physiology	IPK database	Dwarf 5		0.0322304	0.104912	0.0443659
QTL3H_4	3H 138-148 cM	9KiSelect	Root & Shoot System	Oyiga 2019	main shoot axis nodal root cortical area	Assosiation Panel	0.0606335	0.156593	0.0384602
Hv13GEIII/ Bmac 0357	3H 152-167cM / 550-601mio bp	97 SSR Markers	drought tolerance	Hamam 2004	Yield components	Scarlett x ISR 42-8	0.101968	0.165367	0.0727573
QTL3H_1	3H 35-38 cM	9KiSelect	Yield physiology	Oyiga 2019	Nodal root system size & plant height & harvest index & grain Yield components	Assosiation Panel	0.0167782	0.160459	0.0821016
Qrdw.S42IL.3H	3H 38-40 cM (64-66 cM BOPA1)	BOPA1	Root & Shoot System	Naz 2014	Root dry weight	Scarlett x ISR 42-8	0.0139085	0.0831621	0.0596572
HvFT2	3H 43-47 cM	9KiSelect	Yield physiology	Wang 2010	Dwarf 2		0.00621105	0.0567237	0.0616836
Qhei.S42IL-3H	3H 43-54 cM (63-98 cM BOPA1)	BOPA1	drought tolerance	Honsdorf 2014	Plant Height	Scarlett x ISR 42-8	0.0115378	0.115402	0.057192
-	3H 44.3-46.2 cM	9KiSelect	Yield physiology	Alqudah 2016	Plant Stature	Assosiation Panel	0.00758332	0.0571078	0.0582043
Brt2	3H 40-50 mio bp	ref Genome / 99 RILs	Yield components	Komatsuda 2004	Ear brittleness	Assosiation Panel	0.0027659	0.0206002	0.0524587
Brt1	3H 40-50 mio bp / 48mio bp	ref Genome / 99 RILs	Yield components	Komatsuda 2004	Ear brittleness	Assosiation Panel	0.0027659	0.0206002	0.0524587
Dwarf61	3H 50-53 cM	9KiSelect	Root & Shoot System	Oyiga 2019	Plant height & semi-dwarf single recessive gene uzu gene	Assosiation Panel	0.0139171	0.141429	0.0564299
QRS.3H	3H 51-53 cM	9KiSelect	Root System	Reinert 2016	Root-Shoot Ratio	Assosiation Panel	0.0143767	0.146981	0.0566849
HvHXK9	3H 54-59 cM	9KiSelect	Yield physiology	Alqudah 2016	Plant Height	Assosiation Panel	0.011382	0.0998168	0.0398761
QTL3H_3	3H 56-61 cM	9KiSelect	Yield physiology	Oyiga 2019	Flowering / Dwarf 61	Assosiation Panel	0.015185	0.11977	0.0286859
-	3H 62-64 cM	9KiSelect	Yield physiology	Guan 2012	Dwarf 10	Maize	0.0152074	0.133687	0.0349413
Denso	3H 634mio bp (630-640)	ref Genome	Yield physiology	Xu 2017	Plant Height / Gibbereline Oxidase	-	0.512891	0.535407	0.0725886
-	3H 655mio bp (650-660)	ref Genome	Nutrient uptake	IPK database	Potassium transporter	-	0.0191453	0.0988606	0.0449129
-	3H 655mio bp (650-660)	ref Genome	Yield physiology	IPK database	Chloroplast activity	-	0.0191453	0.0988606	0.0449129
-	3H 667mio bp	ref Genome	Nutrient uptake	IPK database	Potassium transporter	-	0.0273736	0.0789063	0.0380372
Qrdw.S42IL.4H	4H 1-14 cM (5-27 cM BOPA1)	BOPA1	Root & Shoot System	Naz 2014	Root dry weight	Scarlett x ISR 42-8	0.153072	0.195158	0.0751601
QRL.S42IL.4H.a	4H 1-15 cM (5-26 cM)	BOPA1	Root & Shoot System	Naz 2014	Root length	Scarlett x ISR 42-8	0.110297	0.164441	0.0799955
VrnH2	4H 100 cM (95-105cM Region)		Yield physiology	Yan 2004	Vernalisation & Flowering	-	0.025599	0.0746955	0.135214
Qtil.S42IL-4H	4H 111 cM (171-183 cM BOPA1)	BOPA1	drought tolerance	Honsdorf 2014	Tiller & Height integral	Scarlett x ISR 42-8	0.046993	0.0388759	0.141772
Qlr.S42-4H.a	4H 125-132 cM / 613-620mio bp	98 SSR Markers	Resistance	Von Korf 2005	Leaf rust	Scarlett x ISR 42-8	0.0233068	0.107131	0.0976489
Ebmac 0701	4H 130-150 cM / 613mio bp	97 SSR Markers	drought tolerance	Hamam 2004	relative leaf water content	Scarlett x ISR 42-8	0.0229116	0.0121011	0.0615811
HvPRR59	4H 51 cM	9KiSelect	Yield physiology	Alqudah 2016	Dormancy	Assosiation Panel	0.00533908	0.0285081	0.0981656
Qhei.S42IL-4H	4H 52-81 cM (74-119 cM BOPA1)	BOPA1	drought tolerance	Honsdorf 2014	Plant Height	Scarlett x ISR 42-8	0.00995029	0.118052	0.115632
	4H 52,000 bp	ref Genome	Nutrient uptake	IPK database	copper ion binding	-	0.151514	0.263117	0.0762724
HvD4	4H 59.6-59.8 cM	9KiSelect	Yield physiology	Alqudah 2016	Plant Height / reduced plant height	Assosiation Panel	0.012418	0.150363	0.111672
Qgh.S42IL.5H	5H 122-138 cM (204-231 cM BOPA1)	BOPA1	Root & Shoot System	Naz 2014	Growth Habit & Root dry weight & Root length & Root Volume & Tiller number	Scarlett x ISR 42-8	0.0427616	0.130515	0.150114
-	5H 143.7-146.1 cM	9KiSelect	Yield physiology	Alqudah 2016	Photoperiodic tillering	Assosiation Panel	0.115823	0.166933	0.102121
QTL5H_1	5H 23-26 cM	9KiSelect	Root & Shoot System	Oyiga 2019	Tiller nodal root xylem vessel area	Assosiation Panel	0.0238638	0.122646	0.0104521
QGL5H / QGW5H	5H 393–501mio bp	712 DArT markers / ref Genome	Yield components	Watt 2019	Grain length / Grain width	Vlamingh x Buloke	0.331442	0.269218	0.00494399
-	5H 43.7-50 cM	9KiSelect	Yield physiology	Alqudah 2016	Plant Stature	Assosiation Panel	0.16301	0.18971	0.00283017
HvBC12/GGD1	5H 46-47 cM	9KiSelect	Yield physiology	Alqudah 2016	Aspargine Synthase/ Gibbereline Deficit DWARF	Assosiation Panel	0.352302	0.231689	0.00193307
Bmag 0357	5H 47 cM / 580mio bp	97 SSR Markers	drought tolerance	Hamam 2004	leaf per tiller & Yield components & Biomass	Scarlett x ISR 42-8	0.0982943	0.0862832	0.182651
SD1	5H 488-510 mio bp	ref Genome	Yield physiology	Sato 2016	seed dormancy	-	0.0228604	0.0342714	0.0164384
QRL.S42IL.5H.a	5H 52-58 cM (106-109 cM BOPA1)	BOPA1	Root & Shoot System	Naz 2014	Root length	Scarlett x ISR 42-8	0.139853	0.148197	0.00601874
NRT3.1	5H 647mio bp	ref Genome	Nutrient uptake	IPK database	Nitrate transport	-	0.0779116	0.183415	0.127523
NRT2.6	6H 13mio bp	ref Genome	Nutrient uptake	IPK database	Nitrate transport	-	0.0108675	0.110552	0.10231
-	6H 16 mio bp	ref Genome	Nutrient uptake	IPK database	copper transporters	-	0.0084059	0.103843	0.0896872
Qagri.S42IL-6H	6H 49-76 cM (74-134 cM BOPA1)	BOPA1	drought tolerance	Honsdorf 2014	Biomass & Growth Plant Height & Shoot Area & WUE	Scarlett x ISR 42-8	0.0609998	0.124118	0.106069
Ryd3	6H 50 cM	Marker Set	Resistance	Lübken 2014	Barley Yellow Dwarf Virus	L94 x L94-QTL3	0.22774	0.197535	0.100489
-	6H 531mio bp	ref Genome	Nutrient uptake	IPK database	Transport	-	0.131382	0.275881	0.141695
Nitrate Reductase 1	6H 538mio bp	ref Genome	Nutrient uptake	IPK database	Nitrate reduction	-	0.220843	0.276852	0.148664
-	6H 9cM	9KiSelect	Yield physiology	Alqudah 2016	Tillering	Assosiation Panel	0.0173835	0.0500144	0.114825
Qrdw.S42IL.7H.a	7H 12-30 cM (17-45 cM BOPA1)	BOPA1	Root & Shoot System	Naz 2014	Root dry weight & Root Volume	Scarlett x ISR 42-8	0.0127518	0.117761	0.0475661
AL7.1	7H 133.9 cM	384 BOPA Markers	Yield components	Liller 2017	Awn length	Morex x Wild types	0.0153001	0.0294386	0.00278117
HvBRD2	7H 140 cM	9KiSelect	Yield physiology	Alqudah 2016	DWARF2 / Tillering	Assosiation Panel	0.014163	0.116043	0.000727161
QLR.S42-7H.a	7H 166-181 cM / 637-655mio bp	98 SSR Markers	Resistance	Von Korf 2005	Leaf rust	Scarlett x ISR 42-8	0.0167261	0.054729	0.00220475
QRI.7H	7H 3-4 cM	9KiSelect	Root System	Reinert 2016	Root length	Assosiation Panel	0.0190279	0.140855	0.0119942
Qrdw.S42IL.7H.b	7H 76-78 cM (119-121 cM BOPA1)	BOPA1	Root & Shoot System	Naz 2014	Root dry weight	Scarlett x ISR 42-8	0.0727941	0.149238	0.0375802
D35	7H 76-79 cM	9KiSelect	Yield physiology	Itoh 2004	Dwarf 35	Rice	0.0725823	0.142776	0.0376655
Qhei.S42IL-7H	7H 90-127 cM (134-193 cM BOPA1)	BOPA1	drought tolerance	Honsdorf 2014	Plant Height	Scarlett x ISR 42-8	0.0144945	0.125782	0.0254148
